# Supplementary material for: Gummy Stem Blight Resistance in Melon: Inheritance Pattern and Development of Molecular Markers
Source: MDPI journal article supplement (doi:10.3390/ijms19102914), 2018-09-25
Supplement: s1 [file s1]

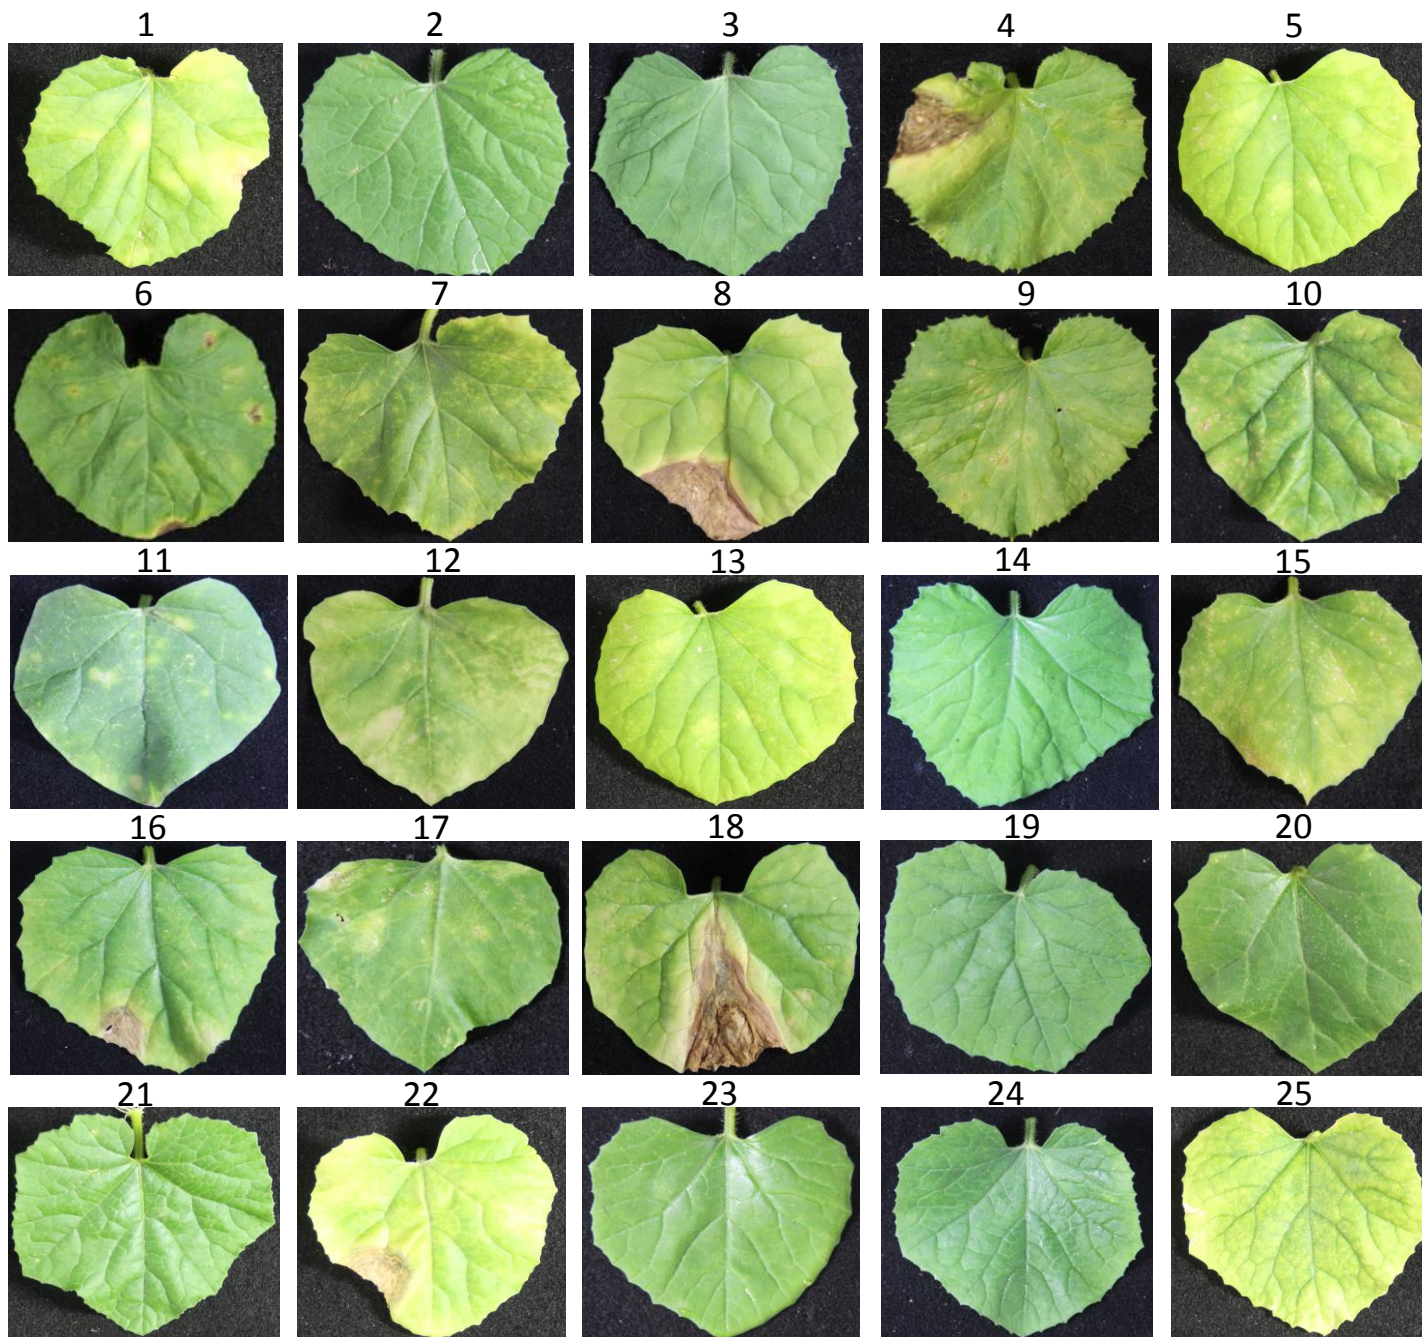



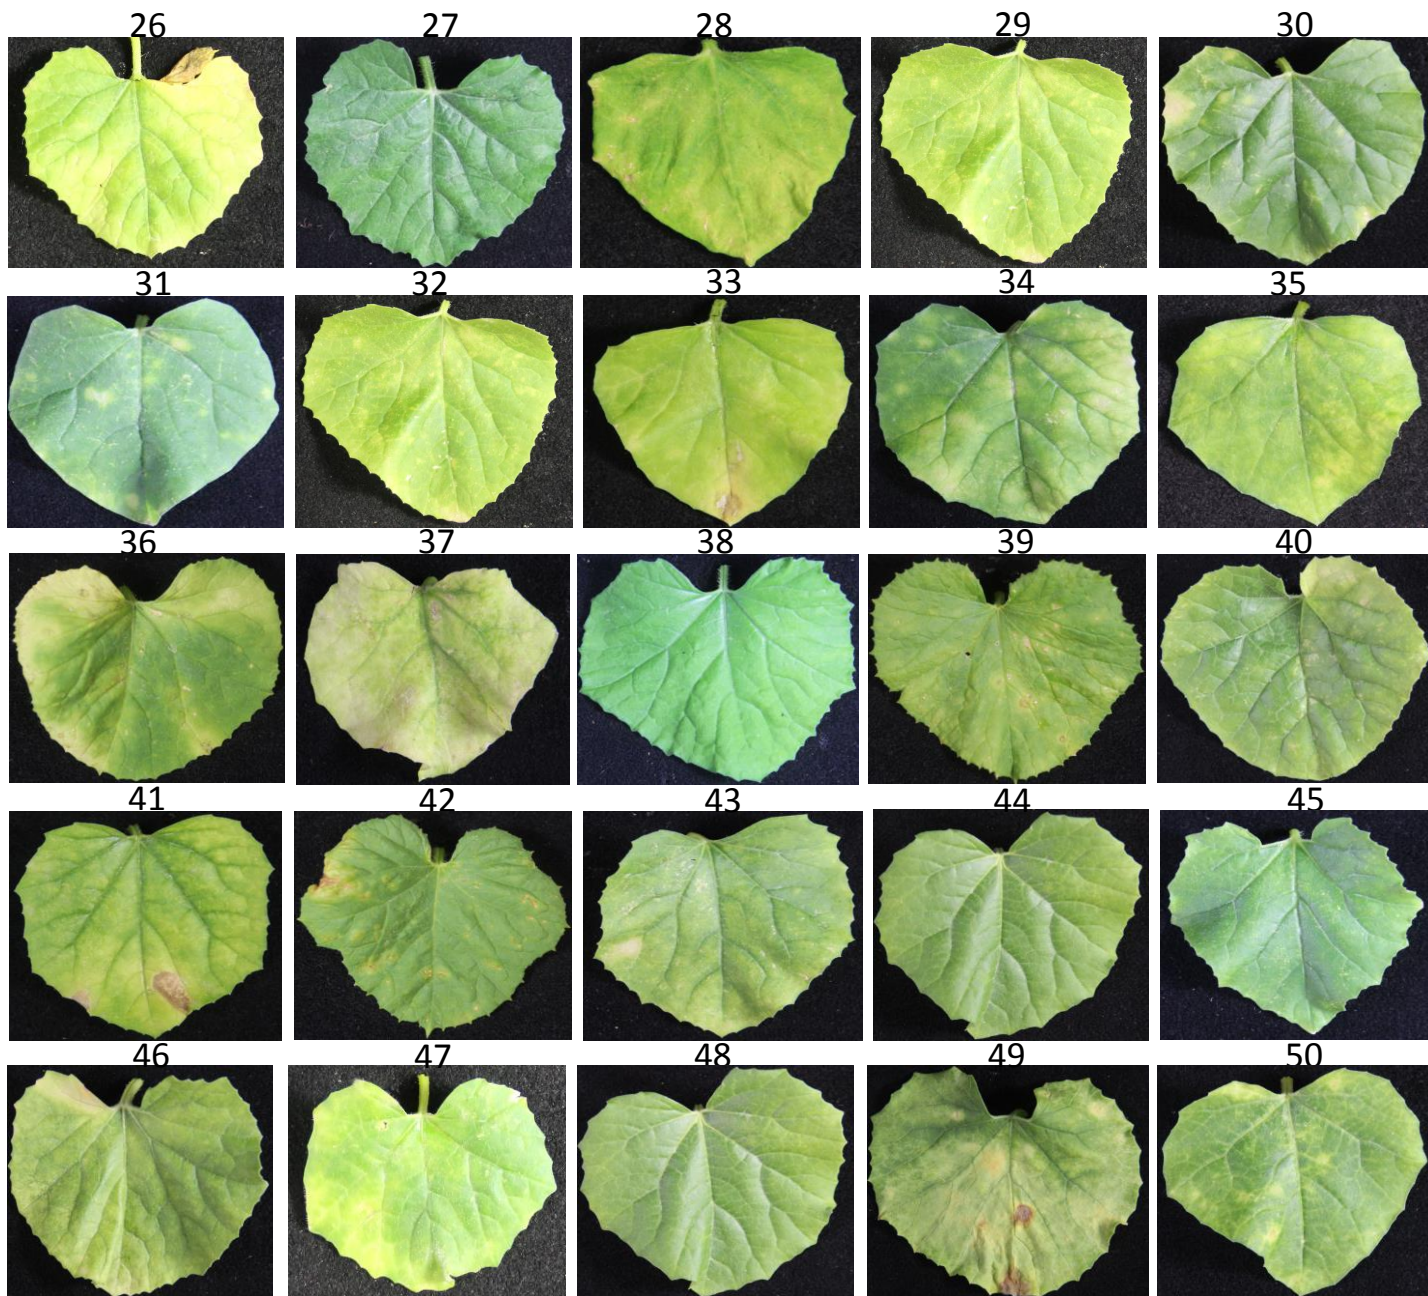



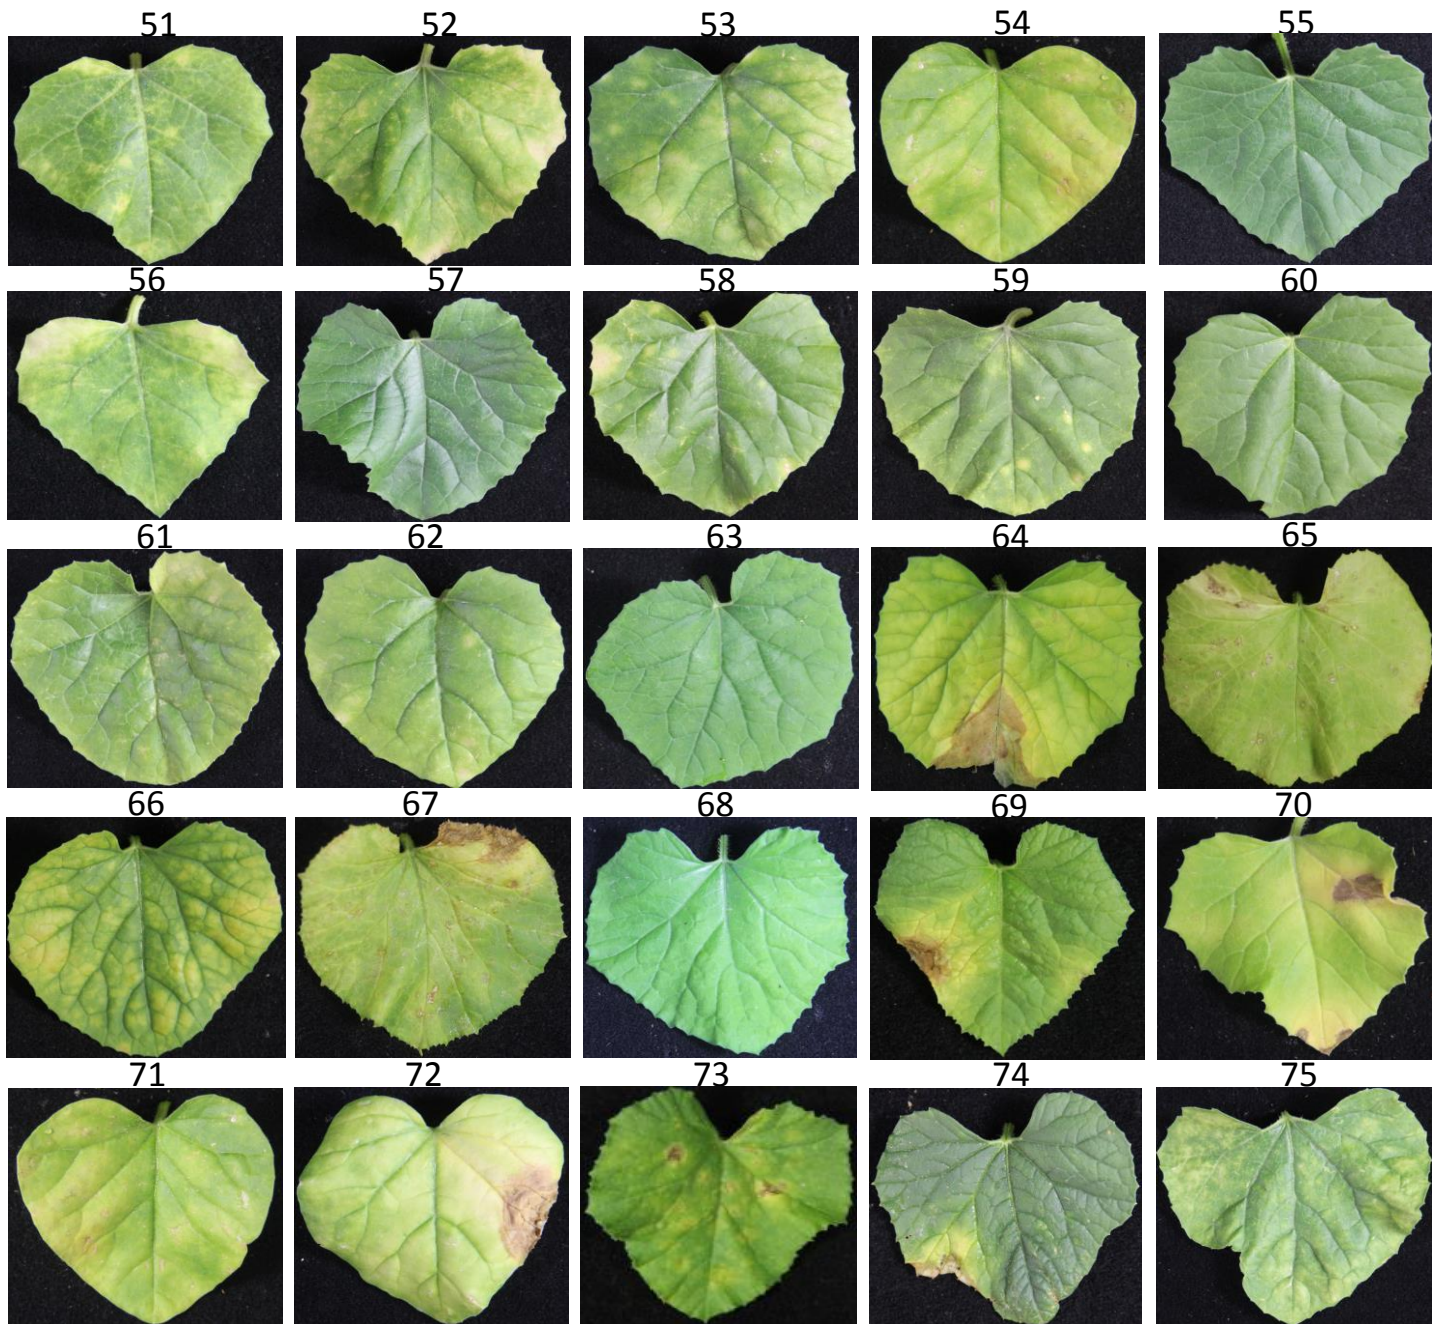



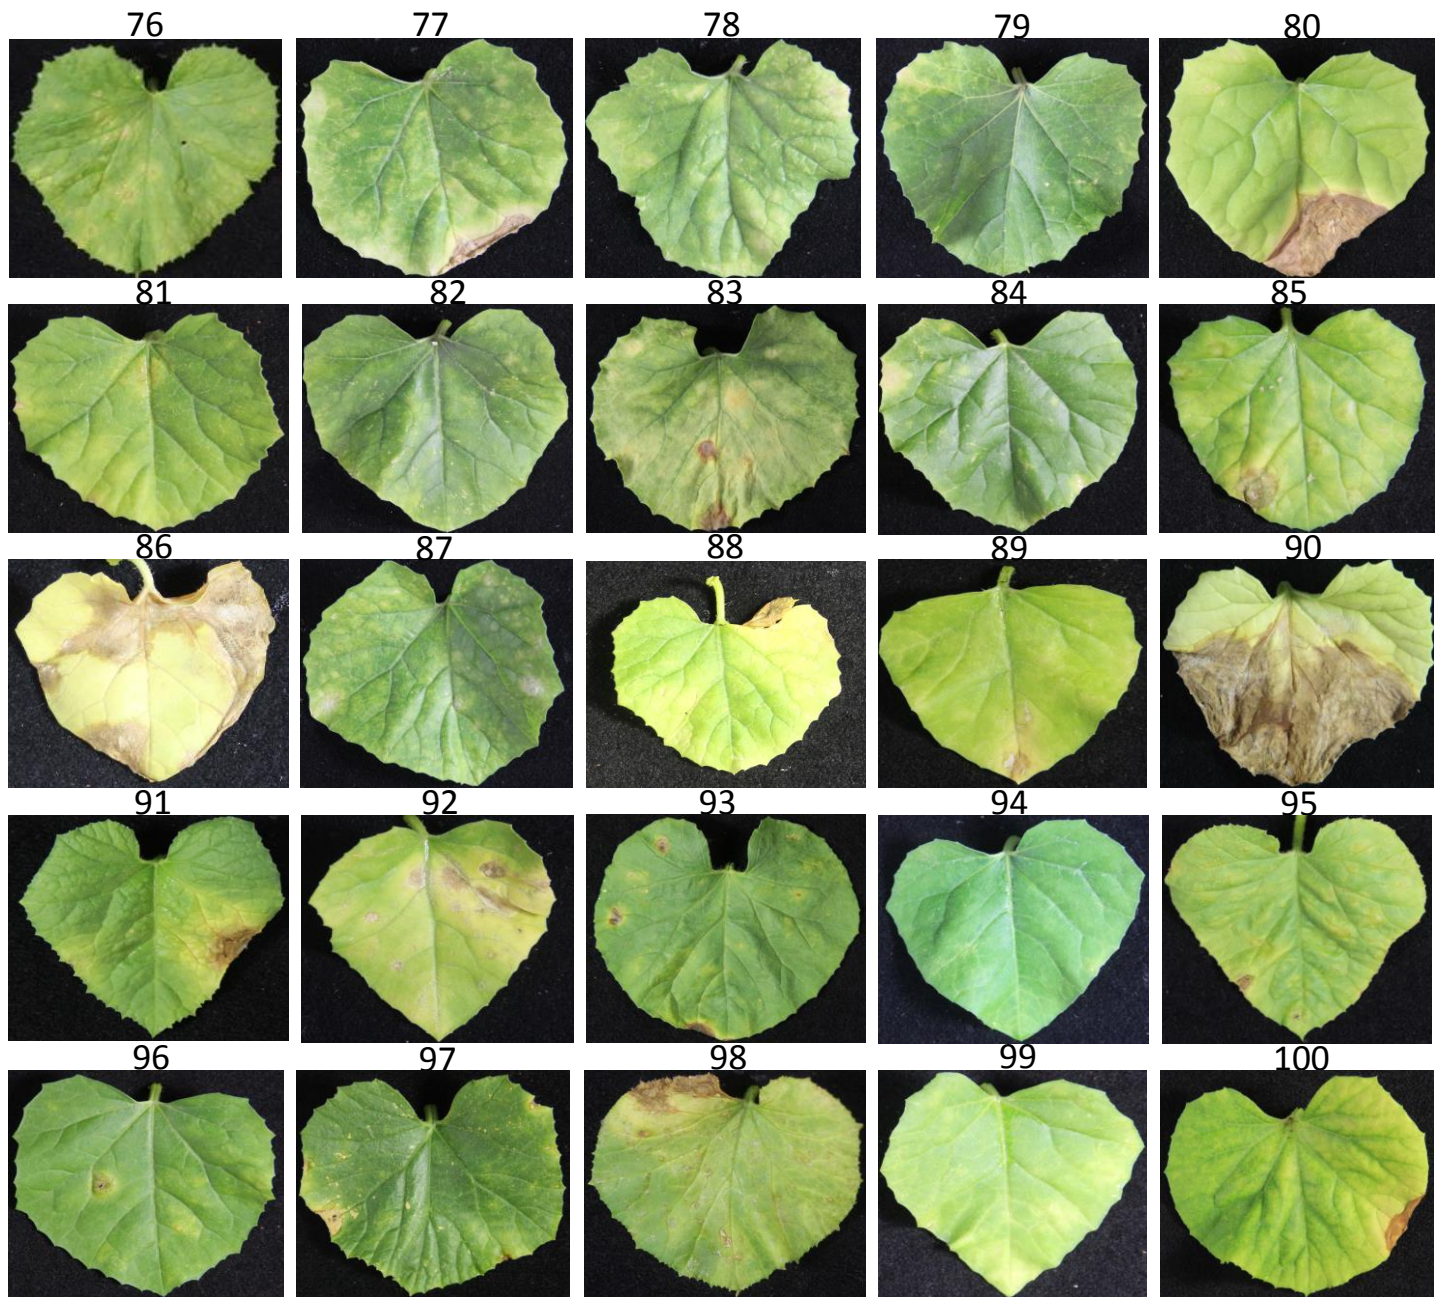



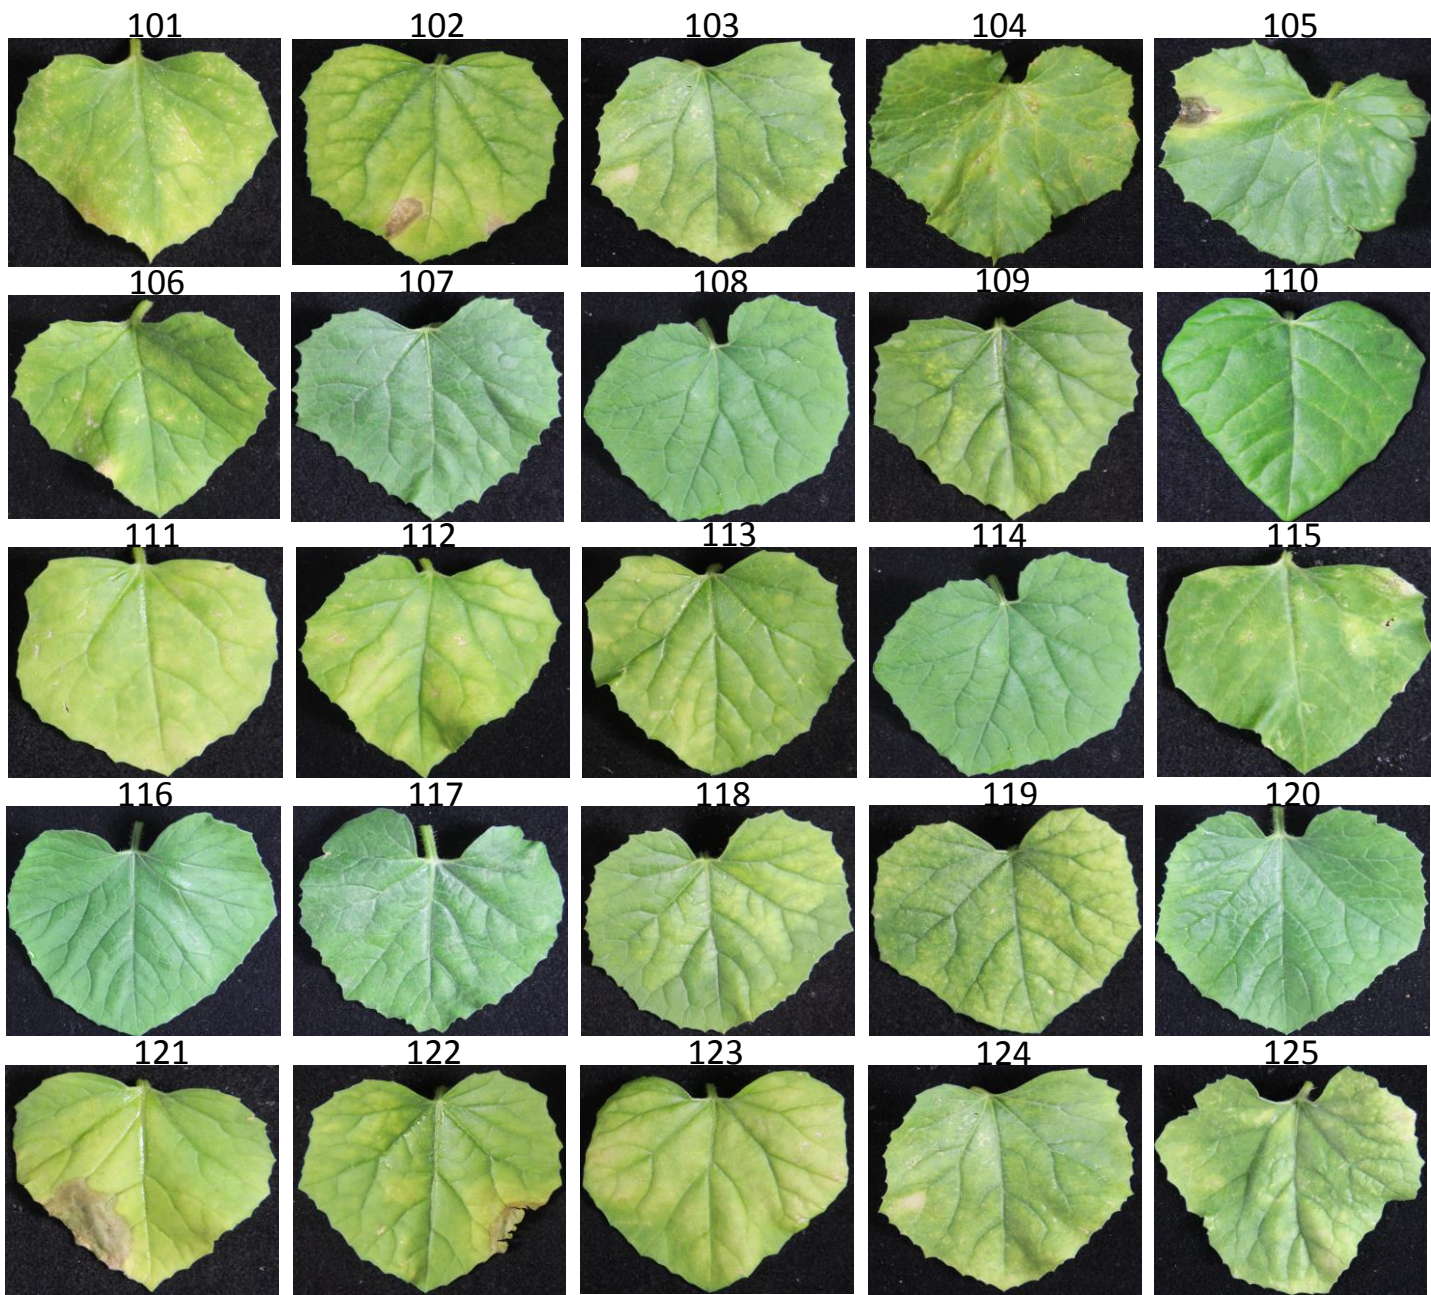



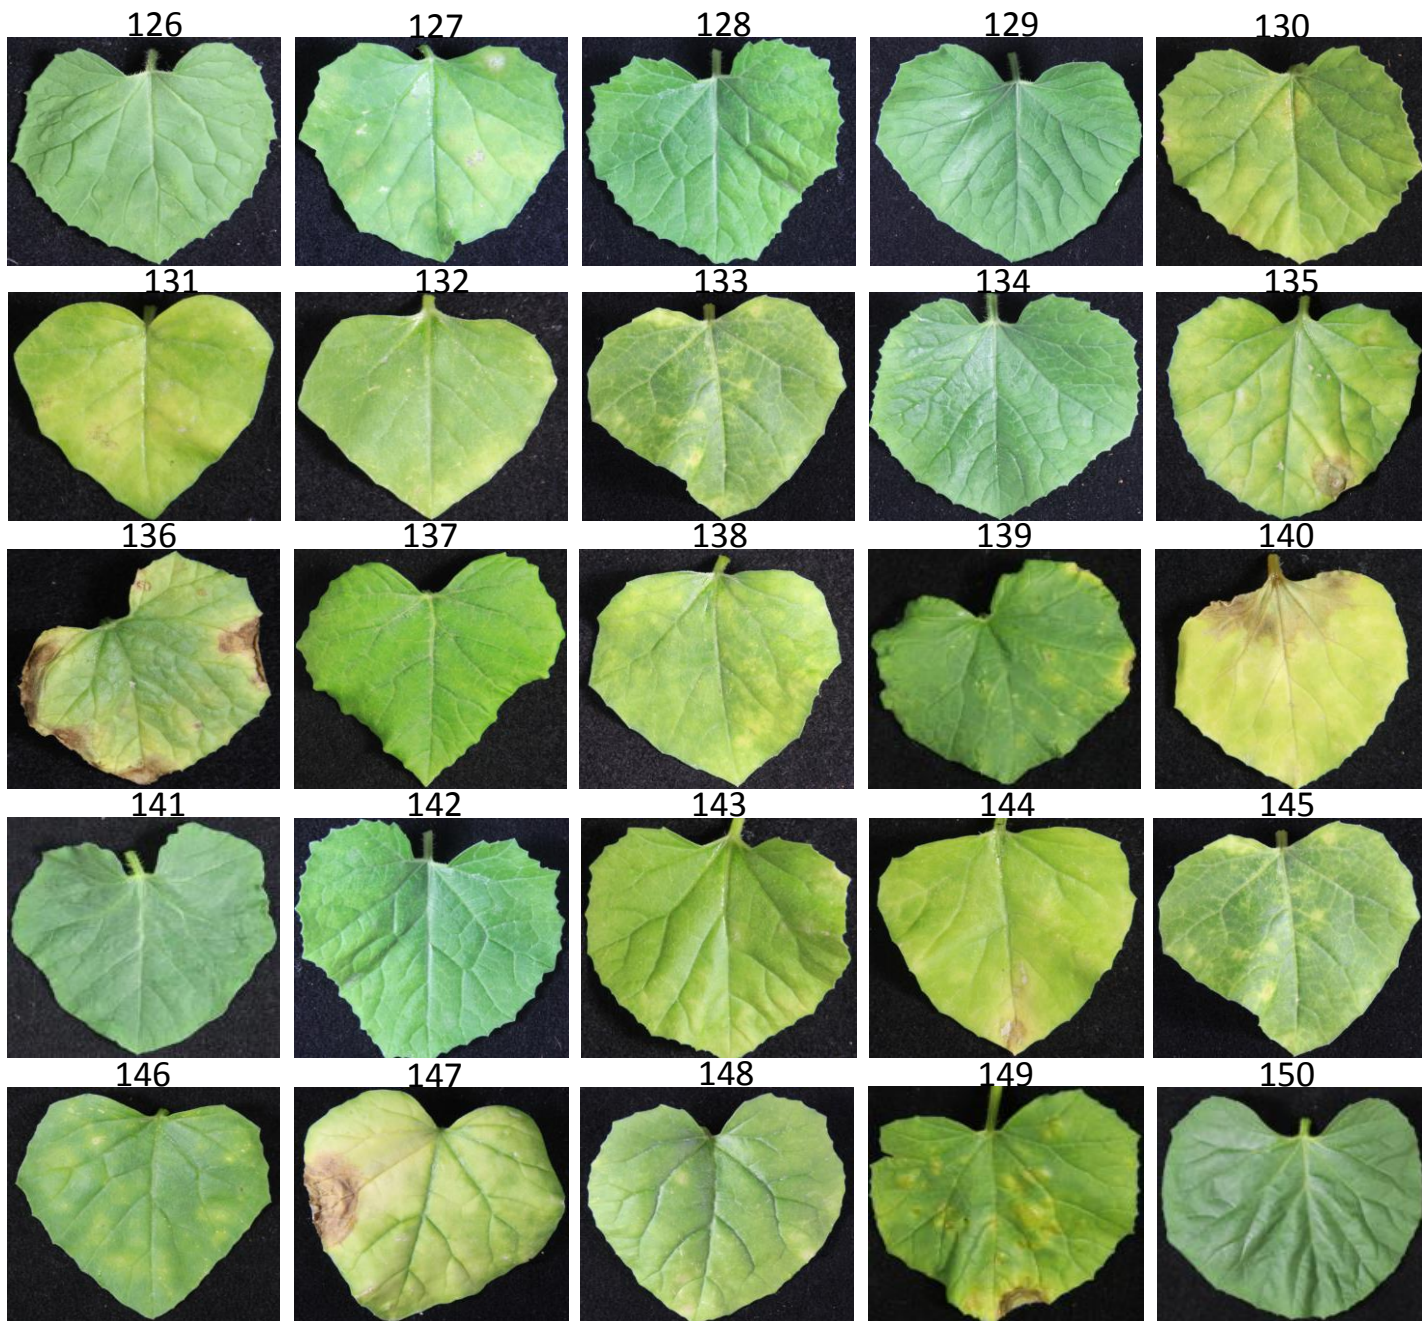

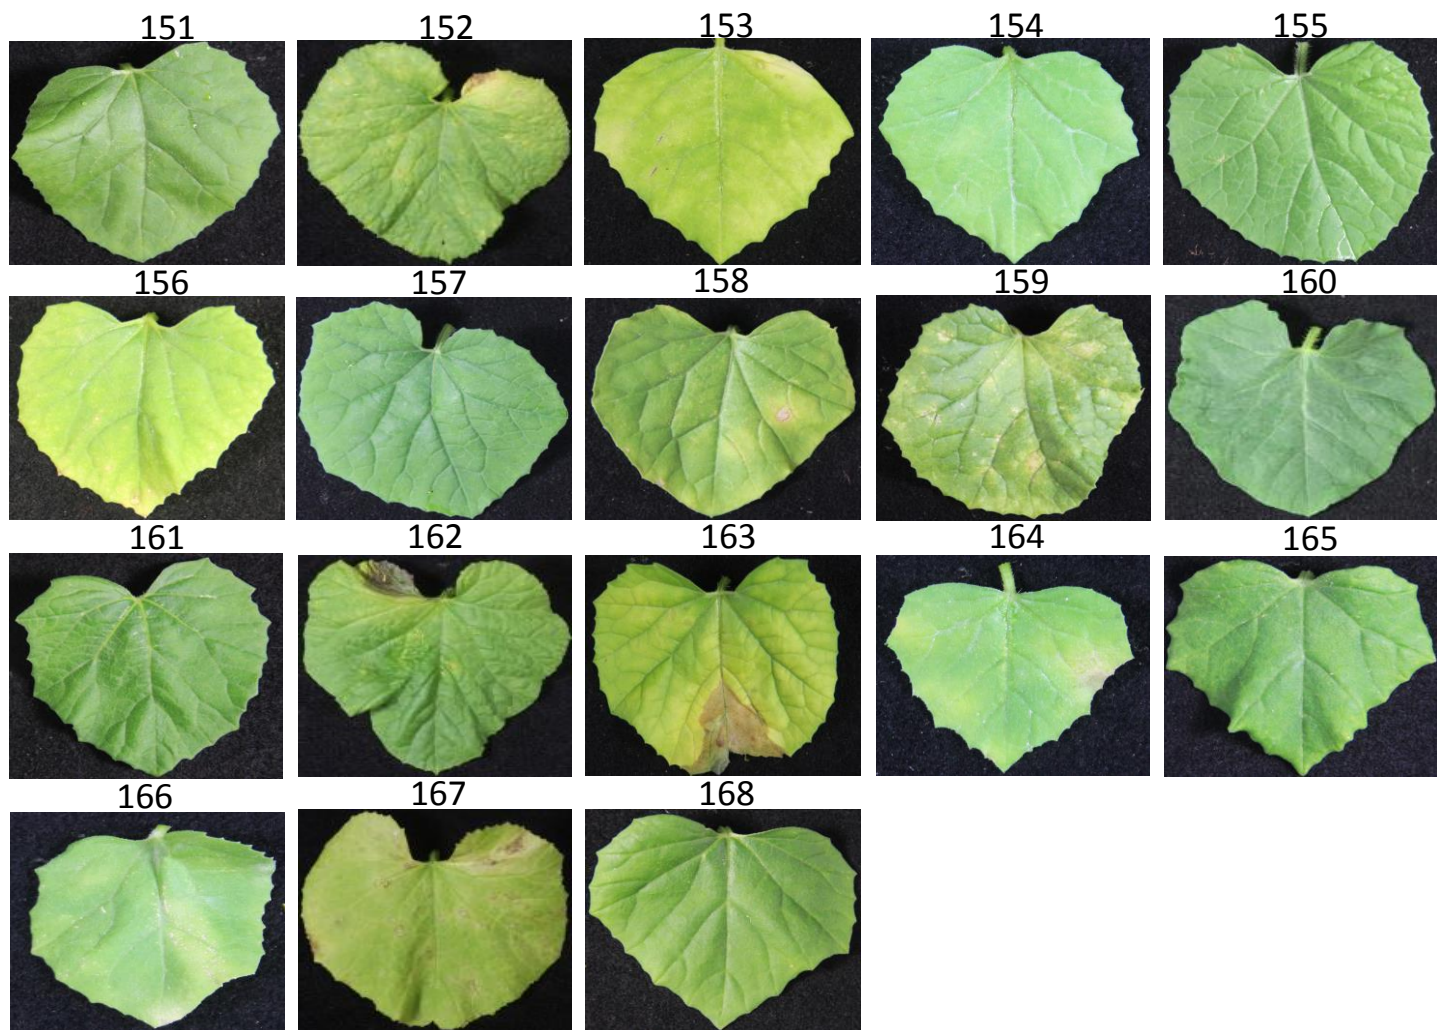

Figure S1. Disease symptoms of melon  $F_2$  population 14 days after being inoculation with *Didymella bryoniae* fungus.
